# Supplementary material
Source: PubMed Central journal article supplement (PMC5136329)
Supplement: NIHMS827064-supplement-1.pdf [file NIHMS827064-supplement-1.pdf]

### 22Rv1 cells

### PC-3 cells

### C4-2 cells

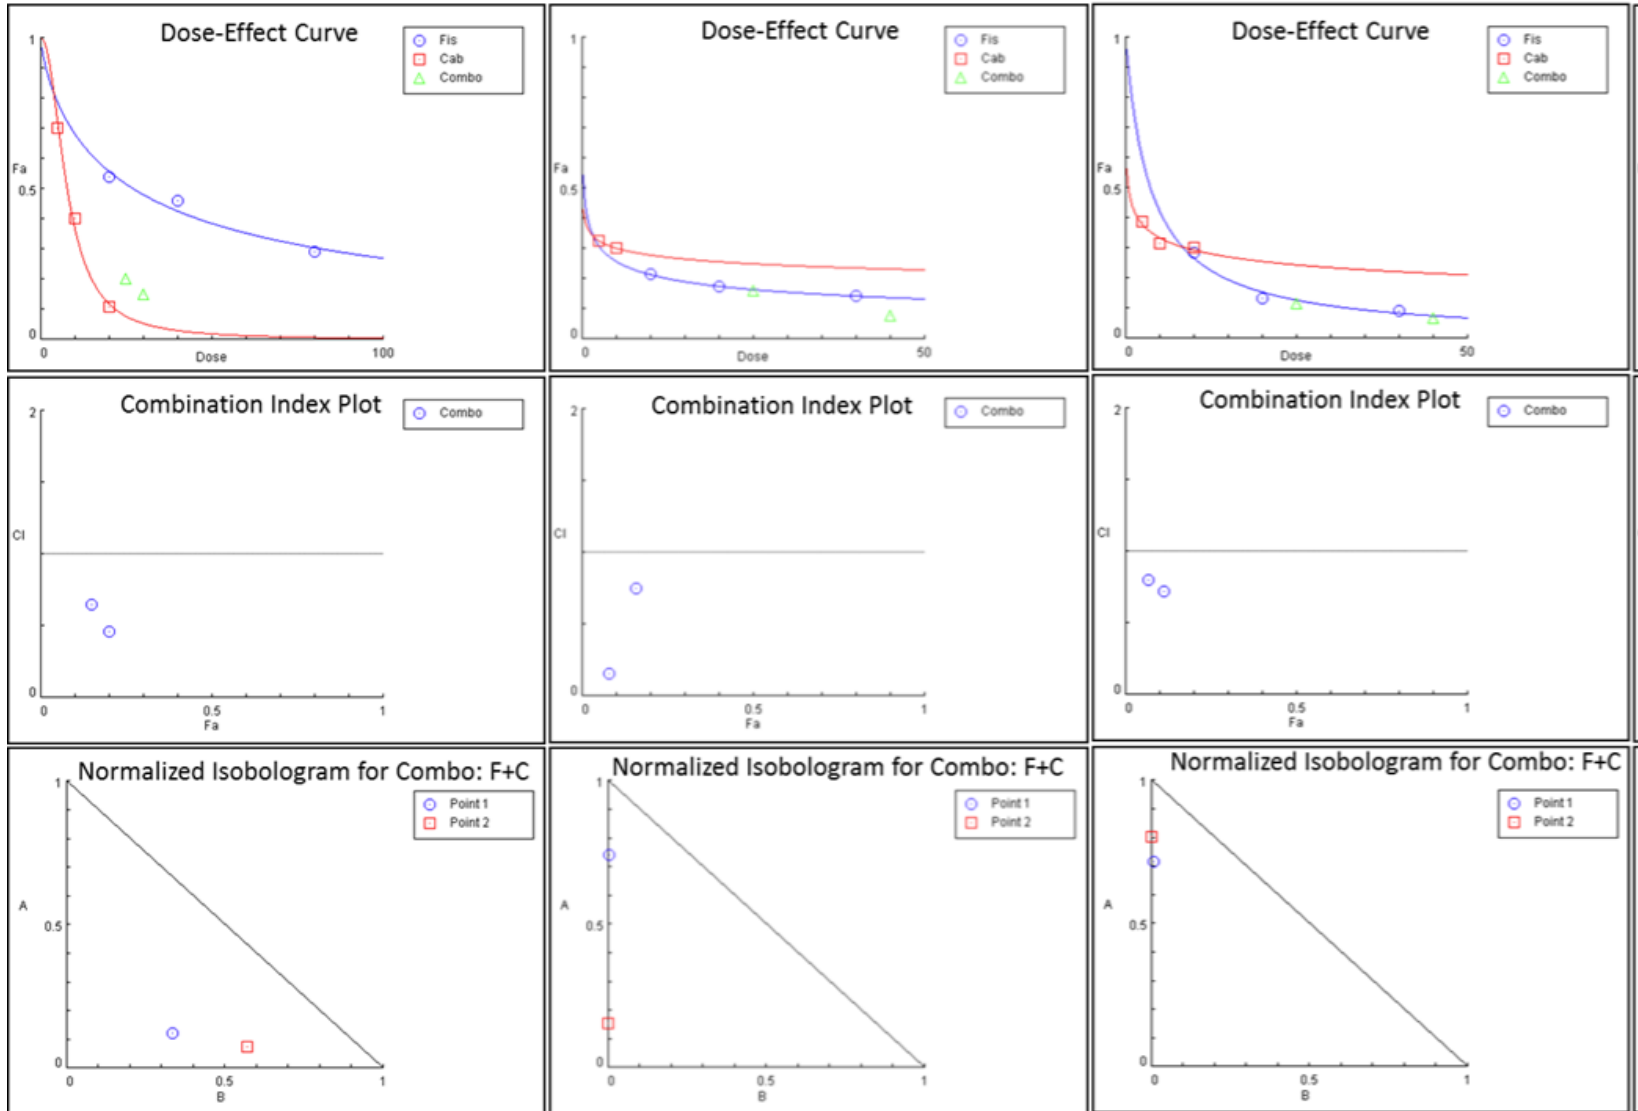

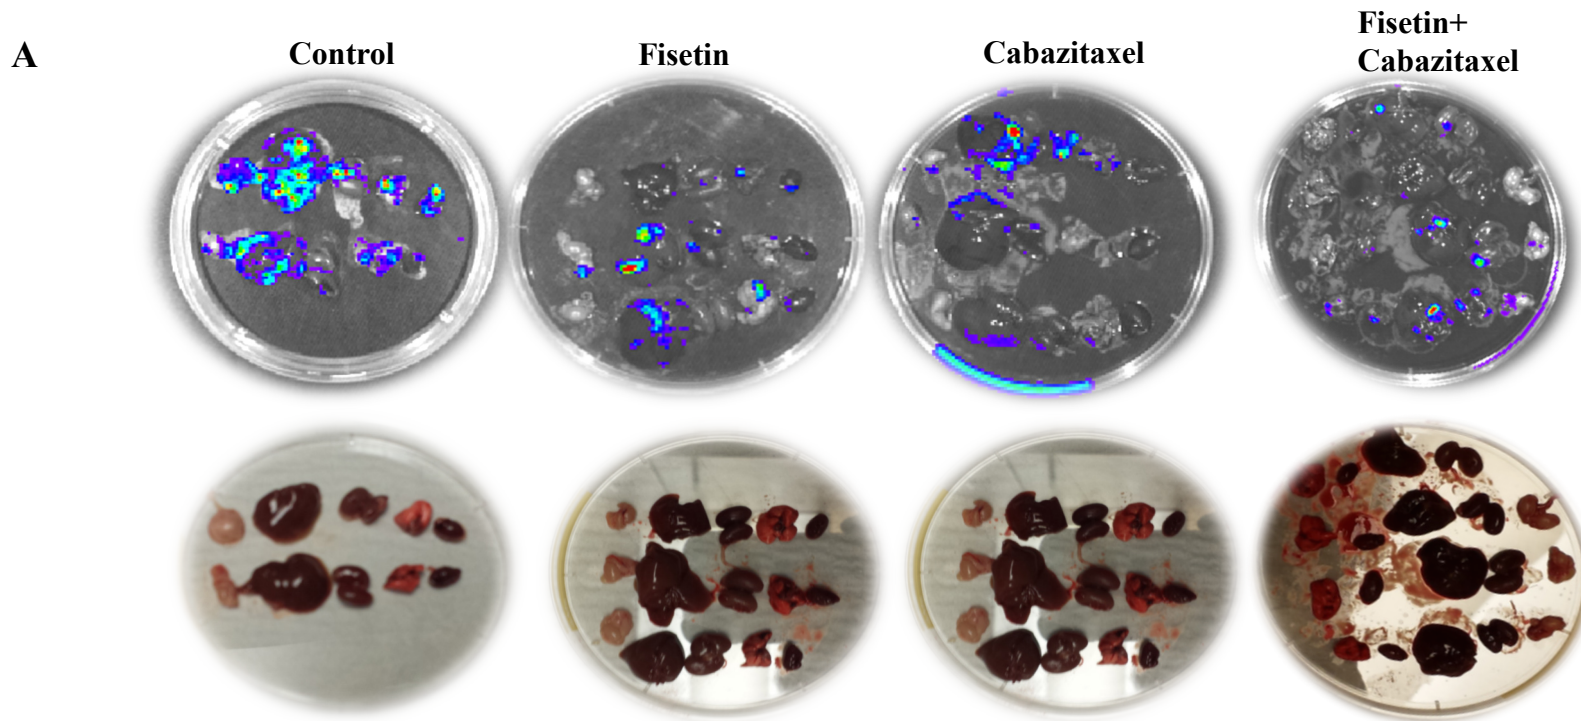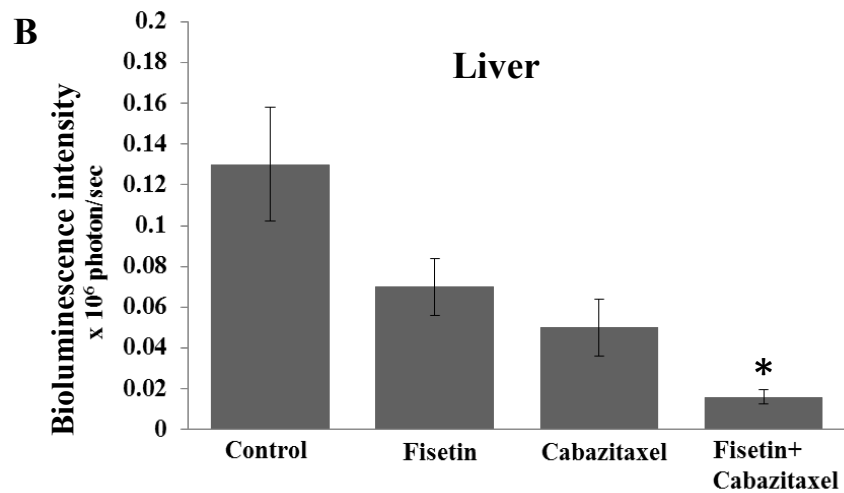

**Supplementary Figure Legends:**

**Figure S1. Effect of fisetin and cabazitaxel, and their combination *in-vitro*.** Fisetin (20  $\mu$ M), cabazitaxel (5nM) and the combination (Fisetin 20  $\mu$ M and cabazitaxel 5nM) synergistically inhibits cell viability in 22Rv1, PC-3M and C4-2 cell lines.

**Figure S2. Effect of fisetin and cabazitaxel treatment of metastatic growth of PC-3M-luc-6 cell-derived tumors in mice.** Representative bioluminescence images of excised from left to right lymph nodes, liver, kidney, lung and heart. **B.** ROI intensity as determined by bioluminescence in the combination group compared to control group. \*,  $p \leq 0.05$ .
